# Supplementary material for: Pathological Changes in Early Medieval Horses from Different Archaeological Sites in Poland
Source: MDPI journal article supplement (doi:10.3390/ani14030490), 2024-02-01
Supplement: s1 [file s1]

Table Statistics of recorded pathologies by anatomy

| Anatomical region               | Anatomical element    | Recorded cases |       |
|---------------------------------|-----------------------|----------------|-------|
|                                 |                       | (n)            | %     |
| Head<br>(n=59; 31.7%)           | Skull                 | 16             | 8.6   |
|                                 | Teeth                 | 43             | 23.1  |
| Spine and tail<br>(n=50; 26.9%) | Cervical vertebrae    | 2              | 1.1   |
|                                 | Thoracic vertebrae    | 30             | 16.1  |
|                                 | Lumbar vertebrae      | 16             | 8.6   |
|                                 | Sacral bone           | 1              | 0.5   |
|                                 | Tail                  | 1              | 0.5   |
| Costa (n=3; 1.6%)               | Costa                 | 3              | 1.6   |
| Limbs<br>(n=74; 39.8%)          | Proximal elements     | 15             | 8.1   |
|                                 | Metacarpus/metatarsus | 36             | 19.4  |
|                                 | Phalanges             | 23             | 12.4  |
| $\Sigma$                        |                       | 186            | 100.0 |
